# Supplementary material for: Characterization of the Competitive Pneumocin Peptides of Streptococcus pneumoniae
Source: PubMed Central journal article supplement (PMC6422914; doi:10.3389/fcimb.2019.00055), 2019-03-12
Supplement: Table_1.pdf [file Table_1.pdf]

**Table S1 Primers used in this study**

| <b>Primer #</b> | <b>Use in study</b>                                                                           | <b>Sequence</b>                           |
|-----------------|-----------------------------------------------------------------------------------------------|-------------------------------------------|
| 1               | <i>blpA</i> F common for RFLP, confirmation<br><i>blpI</i> cloning, <i>blpKin</i> cloning A76 | GAGGAACAAATGTACGTTTATA                    |
| 2               | <i>blpY</i> R common primer for RFLP                                                          | ATAGAAGTTGATACTTTTTTCAT                   |
| 3               | in <i>blpA</i> for repeat determination                                                       | GAAGAGATTAGGGTTTTGTGCCA                   |
| 4               | in <i>blpA</i> for repeat determination                                                       | AGCCGCTGATGAAATGGGC                       |
| 5               | <i>blpI</i> deletion cloning F PstI                                                           | GGGCCCTGCAGGTGAGCGACTTTATAGT<br>TTCAATCCC |
| 6               | <i>blpI</i> deletion cloning R KpnR                                                           | TTCTAAAGTTCCTAAAATGATTGGTACCGG<br>GCCC    |
| 7               | <i>blpI</i> deletion inverse pcr F                                                            | CCCGGGATGCATTAAGATTATGATTCTTAA<br>ATATA   |
| 8               | <i>blpI</i> deletion inverse pcr R                                                            | CCCGGGATGCATGACAAATACTCCTTTTTT<br>ATT     |
| 9               | confirmation <i>blpI</i> cloning R                                                            | CCCGGGAGATTTCAATAATCTTGAGTAT              |
| 10              | janus amplification F NsiI                                                                    | GATCATGCATGTTTGATTTTTTAATGGATAA<br>T      |
| 11              | janus amplification R NsiI                                                                    | ACCTATGCATCTTTCCTTATGCTTTTGGAC            |
| 12              | <i>blpW1,2</i> deletion cloning F                                                             | GGGCCCGGTACCCAAAAATAGGAGAATAT<br>TTTTC    |
| 13              | <i>blpW1,2</i> deletion cloning R                                                             | CCCGGGATGCATGACAAATACTCCTTTTTT<br>ATT     |
| 14              | <i>blpW1,2</i> inverse PCR F smaI                                                             | GCGCGCCCCGGGACAAATACTCCTTTTT<br>AAAAA     |
| 15              | <i>blpW1,2</i> inverse PCR R smaI                                                             | GCGCGCCCCGGGTAAAAAATCATCTAGAC<br>ATTAAA   |
| 16              | janus amplification F SmaI                                                                    | GACTTGCCCGGGTCATTAGCTTTTTTAGTG<br>GA      |
| 17              | janus amplification R SmaI                                                                    | GACTTCCCCGGGGAGCACTTTGTAAGTCT<br>GTTG     |
| 18              | <i>blpKin</i> clone R A76 <i>blpL</i> R                                                       | TCTCGCAAGGAAGATGTTCCG                     |
| 19              | <i>blpG</i> truncation cloning NsiI                                                           | GGGCCCATGCATGAAGAACATAAGTTTTA<br>TCTTT    |
| 20              | <i>blpG</i> truncation cloning XbaI                                                           | GGCCTCTAGACAGCTGAAAGAAAGACAGC<br>A        |
| 21              | <i>blpG</i> truncation check                                                                  | GGACAATGCTAAAAAATCAT                      |

|    |                                                                                                                                  |                                          |
|----|----------------------------------------------------------------------------------------------------------------------------------|------------------------------------------|
| 22 | <i>lacZ</i> R to confirm chromosomal integration, reverse primer to amplify <i>blpA::KanR-rpsL+</i> and <i>blpA<sub>FS</sub></i> | TCAAAAATAATTTCGCGTCTG                    |
| 23 | <i>tdpA</i> clone F                                                                                                              | TAAAAAGTAGAGCTTAATGAA                    |
| 24 | <i>tdpA</i> clone R                                                                                                              | AAATTTTCCATCCAATCATAA                    |
| 25 | outside <i>tdpA</i> clone F                                                                                                      | TATCATGCTTCTGCTTATGT                     |
| 26 | outside <i>tdpA</i> clone R                                                                                                      | CCTTAACAATGTTAGTATAC                     |
| 27 | in <i>blpA</i> F for <i>blpI</i> deletion                                                                                        | TTATCTTTATGGGGTTGATAG                    |
| 28 | in <i>pncC</i> R for <i>blpI</i> deletion                                                                                        | CCCGGGAGATTTCAATAATCTTGAGTAT             |
| 29 | in <i>blpG</i> R for <i>blpI</i> deletion                                                                                        | GGCTTTTCCAAGGACGGTAG                     |
| 30 | <i>blpI-J</i> ko gibson upstream                                                                                                 | TTATCTTTATGGGGTTGATAG                    |
| 31 | <i>blpI-J</i> ko gibson upstream                                                                                                 | ataagtcttaTTGTTCCATCATTTTTGTATTC         |
| 32 | <i>blpI-J</i> ko gibson downstream                                                                                               | atggaacaTAAGACTTATAGTAAAATTATGAGGATTC    |
| 33 | <i>blpI-J</i> ko gibson downstream                                                                                               | CTACGGAAAAATTTAAAAACTG                   |
| 34 | <i>blpJ</i> ko only gibson                                                                                                       | ataagtcttaCTGTGACAACATTTTTGTATTC         |
| 35 | <i>blpJ</i> ko only gibson                                                                                                       | ttgtcacagTAAGACTTATAGTAAAATTATGAGGATTC   |
| 36 | <i>blpKin</i> ko gibson upstream                                                                                                 | CTGTTATGGATAATGAAGAACTC                  |
| 37 | <i>blpKin</i> ko gibson upstream janus                                                                                           | taaggaaagTTGTGACATCATTTTTGTATCC          |
| 38 | <i>blpKin</i> ko janus gibson                                                                                                    | atgtcacaCTTTCCTTATGCTTTTGGAC             |
| 39 | <i>blpKin</i> ko janus gibson                                                                                                    | tatccttttGTTTGATTTTTAATGGATAATGTG        |
| 40 | <i>blpKin</i> ko gibson downstream janus                                                                                         | ttaaaaatcaaacAAAAAGGATACAGATAGTACC<br>CC |
| 41 | <i>blpKin</i> ko gibson downstream                                                                                               | GAATACTCCTTACATTTGTTATCTTTATC            |
| 42 | <i>blpKin</i> ko gibson in frame                                                                                                 | tatccttttTTGTGACATCATTTTTGTATCC          |
| 43 | <i>blpKin</i> ko gibson in frame                                                                                                 | atgtcacaAAAAAGGATACAGATAGTACCCC          |
| 44 | <i>blpKout</i> ko gibson upstream                                                                                                | GAACTTATGAATTACTGGCG                     |
| 45 | <i>blpKout</i> ko gibson upstream                                                                                                | attcagacaCTTTCCTTATGCTTTTGGAC            |
| 46 | <i>blpKout</i> ko spect gibson                                                                                                   | gaatcataacGTTTGATTTTTAATGGATAATGTG       |

|    |                                                                           |                                                         |
|----|---------------------------------------------------------------------------|---------------------------------------------------------|
| 47 | <i>blpKout</i> ko spect gibson                                            | aaatccataaCAATTTTTTTATAATTTTTTTAATC<br>TG               |
| 48 | <i>blpKout</i> ko gibson downstream                                       | taaaaaaattgTTATGGATTTTAAAAGTTTTATT<br>ATTG              |
| 49 | <i>blpKout</i> ko gibson downstream                                       | CACTAATATAGGGATAAAAAGAGAGC                              |
| 50 | <i>blpB</i> F primer to amplify <i>blpA::KanR-rpsL+</i> and <i>blpAFS</i> | GATAAAAATGGCTCCTCTGC                                    |
| 51 | <i>blpS-C</i> ko gibson upstream                                          | CAACTCTTCCGCTGGAC                                       |
| 52 | <i>blpS-C</i> ko gibson upstream janus                                    | taaggaagTGTCTGAATAATCATATGTTTCAT<br>TG                  |
| 53 | <i>blpS-C</i> ko janus gibson                                             | attcagacaCTTTCCTTATGCTTTTGGAC                           |
| 54 | <i>blpS-C</i> ko janus gibson                                             | gaatcataacGTTTGATTTTAAATGGATAATGTG                      |
| 55 | <i>blpS-C</i> ko gibson downstream janus                                  | aaaatcaaacGTTATGATTCTCCTTTTTGATAAG                      |
| 56 | <i>blpS-C</i> ko gibson downstream                                        | CATAATACCTTATGAATTTACTAAAC                              |
| 57 | <i>blpS-C</i> ko gibson in frame                                          | gaatcataacTGTCTGAATAATCATATGTTTCAT<br>TG                |
| 58 | <i>blpS-C</i> ko gibson in frame                                          | attcagacaGTTATGATTCTCCTTTTTGATAAG                       |
| 59 | <i>iga::kan</i> gibson upstream                                           | TACCGTGTAATTTTCATGGTAG                                  |
| 60 | <i>iga::kan</i> gibson upstream                                           | aatcaaacggaCGCCTTATCACTTACTACAGC                        |
| 61 | <i>iga::kan</i> gibson kan                                                | tgataaaggcgTCCGTTTGATTTTAAATGGATAA<br>TG                |
| 62 | <i>iga::kan</i> gibson kan                                                | tattgccaactCTAAAACAATTCATCCAGTAAAA<br>TATAATATTTTATTTTC |
| 63 | <i>iga::kan</i> gibson downstream                                         | aattgttttagAGTTGGCAATAAGGTAGTACAC                       |
| 64 | <i>iga::kan</i> gibson downstream                                         | CTATTTTTTATTCTCAAAAATTGAACTTC                           |
