# Supplementary material for: Characterization of the Competitive Pneumocin Peptides of Streptococcus pneumoniae
Source: PubMed Central journal article supplement (PMC6422914; doi:10.3389/fcimb.2019.00055), 2019-03-12
Supplement: Table_2.pdf [file Table_2.pdf]

**Table S2 – Accession numbers and strain designations of database matches based on RFLP.**

| <b>Group</b> | <b>AseI BIR fragments</b> | <b>GenBank accession # for genome match</b> | <b>Database match</b> |
|--------------|---------------------------|---------------------------------------------|-----------------------|
| 1            | 2.3,2.1,0.5               | HQ668085                                    | P164                  |
| 2            | 4.5,0.55                  | HQ668083                                    | P140                  |
| 3            | 3.8,1.7,0.55              | AE005672                                    | TIGR4                 |
| 4A           | 3.2,1.7                   | CP018136                                    | SP49                  |
| 4B           | 2.5,1.7,0.7               | CP001033                                    | CGSP14                |
| 5A           | 2.3,0.9                   | CP000920                                    | P1031                 |
| 5B           | 3.3,0.9                   | ABAA01000015                                | SP6BS73               |
| 6            | 2.3,1.7,1.3               | NZ_ABFS01000001                             | CDC1873               |
| 7            | 2.3,1.2,0.37              | CP002176                                    | 670-6B                |
| 8            | 6.0,2.7                   | NA                                          | NA                    |
| 9            | 1.9,1.2                   | NA                                          | NA                    |
